# Supplementary material for: Safety, Antitumor Activity, and T-cell Responses in a Dose-Ranging Phase I Trial of the Oncolytic Peptide LTX-315 in Patients with Solid Tumors
Source: Oxford University Press journal article supplement (doi:10.1158/1078-0432.ccr-20-3435), 2021-02-04
Supplement: 10780432ccr203435-sup-250444_2_supp_6871491_qnjl0m.docx [file 10780432ccr203435-sup-250444_2_supp_6871491_qnjl0m.docx]

**Supplementary Table 2.** Abscopal effects shown by % change from baseline in one non-injected lesion. The localisation of the best responding non-injected lesion and injected lesions. Some patients had more than one lesion injected, annotated by L1-3.

| **Patient ID** | **% change** | **Localisation of best responding**  **non-injected lesion** | **Localisation of injected lesion** |
| --- | --- | --- | --- |
| Vaginal SCC | 134,7 % | right inguinal | L1: right inguinal fold L2: right inguinal fold L3: right inguinal fold |
| Nasal Epidermoid | 115,1 % | cervical mass | L1: cheek |
| Breast Cancer #5 | 110,0 % | lymph node, right subclavicular region | L1: lymph node right side of neck |
| Gastric Cardia Adenoca | 75,8 % | lymph node, adenopathy | L1: left sub clavicular lymph node |
| Breast Cancer #1 | 50,0 % | skin, paravertebral position | L1: medial lesion |
| Sarcoma #4 | 41,2 % | thorax, left side | L1: thorax wall left side |
| Anal Epidermoid #2 | 33,2 % | left inguinal lymph node | L1: left inguinal lymph node |
| Breast Cancer #3 | 20,6 % | right iliac fossa | L1: left back lesions |
| Parotid Adenoca | 16,5 % | lung, left lower lobe | L1: os sphenoidale |
| Melanoma #5 | 11,1 % | skin, sub cutaneous left para lumbar | L1: right dorsal sub cutaneous lesion |
| Anal Epidermoid #1 | 3,9 % | back, trapezius | L1: left supraclavicular L2: right inguinal |
| Melanoma #8 | 2,5 % | skin,upper anterior abdominal wall | L1: left anterior abdominal wall L2: right upper chest |
| Sarcoma #6 | 0,0 % | thorax wall, left side | L1: thorax wall L2: thorax wall |
| Sarcoma #2 | -5,1 % | lymph node, left inguinal | L1: left leg node L2: left leg node L3: left leg node |
| Sarcoma #1 | -5,4 % | Left side musculus rectus | L1: subcutaneous metastases left hip L2: subcutaneous metastasis left hip, lateral |
| Sarcoma #5 | -9,5 % | left lower lobe lung nodule | L1: left side lower back L2: mid-line lower back L3: left side abdomen |
| Melanoma #3 | -13,1 % | intra muscular, left | L1. right sus clavicular |
| Breast Cancer #6 | -13,7 % | skin, right cervical | L1: dorsal L2: dorsal L3: dorsal |
| Breast Cancer #2 | -19,0 % | skin, antero-sternal | L1: anterior face shoulder level axillary hollow |
| Melanoma #6 | -25,0 % | pancreas head | L1: left basi thoracic para vertebral |
| Melanoma #7 | -26,1 % | skin | L1: left axillar adenopathy |
| Adrenal Adenoca | -28,4 % | lung, upper left lobe | L1: sus clavicular |
| Melanoma #2 | -46,3 % | lymph node, abdominal mesenteric | L1: inner right ankle L2: anterior lower leg |
| Breast Cancer #4 | -54,3 % | right anterior chest wall | L1: subcutaneous nodule along right parasternal edge |
| Melanoma #4 | -58,6 % | skin, sub cutaneous right iliac | L1: right dorsal lesion L2: anterior abdominal wall |
| Sarcoma #3 | -65,6 % | lung, left side | L1: Right gluteal muscle |
| Melanoma #1 | -82,0 % | lymph node, left inguinal | L1: superficial right inguinal lymph node L2: more internal right inguinal lymph node |
