# Supplementary material for: Safety, Antitumor Activity, and T-cell Responses in a Dose-Ranging Phase I Trial of the Oncolytic Peptide LTX-315 in Patients with Solid Tumors
Source: Oxford University Press journal article supplement (doi:10.1158/1078-0432.ccr-20-3435), 2021-02-04
Supplement: 10780432ccr203435-sup-250444_2_supp_6871497_qnjl0n.docx [file 10780432ccr203435-sup-250444_2_supp_6871497_qnjl0n.docx]

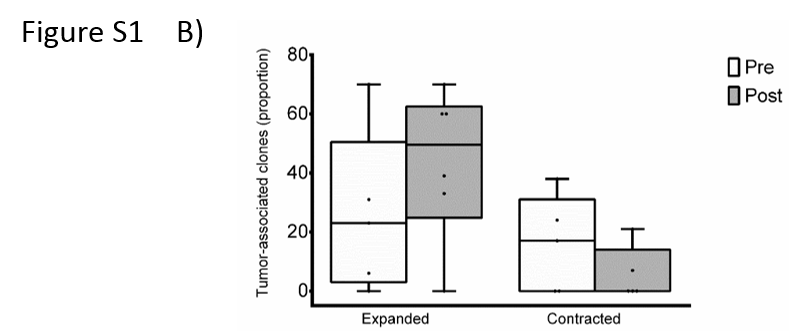

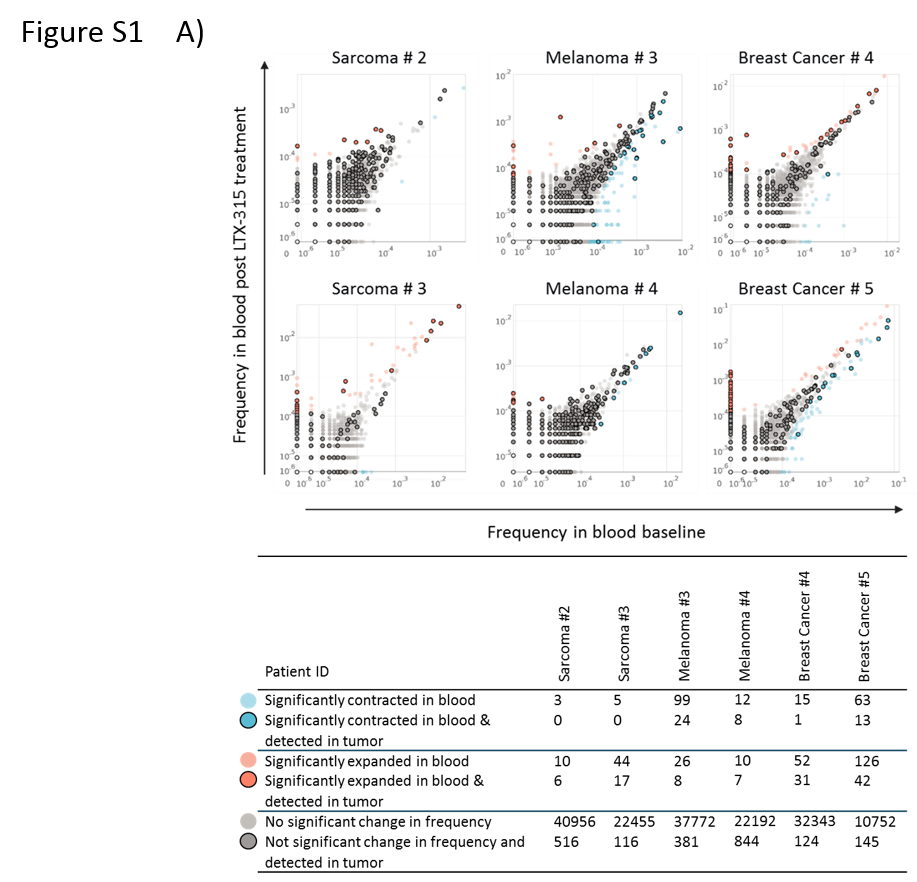


**Supplementary Figure 1**. **LTX-315 increases the TCR repertoire and generates novel tumor- associated T-cell clones post treatment**. **(A)** Trivariate analysis of the abundance of unique T-cell clones in blood (PBMC) baseline compared to 7 weeks after treatment was initiated. T-cell clones that were not significantly changed in frequency are depicted in *gray*, whereas those that were significantly expanding or contracting are depicted in *red* or *blue* respectively. T-cell clones colored without transparency and with a black peripheral line were also present in tumor tissue 7 weeks after treatment. T-cell clones aligned with the y-axis are novel T-cell clones after LTX-315 treatment. **(B)** The proportion of T-cell clones that significantly expanded or contracted in blood after LTX-315 treatment and that were also present in the tumor before and after treatment. Data represents the median of the samples shown in A.
